# Supplementary material for: Análisis de riesgos en centros sanitarios: aspectos metodológicos
Source: MDPI journal article supplement (doi:10.3390/ijms24044086), 1997-01-01
Supplement: s1 [file s1]

## Supplementary Data

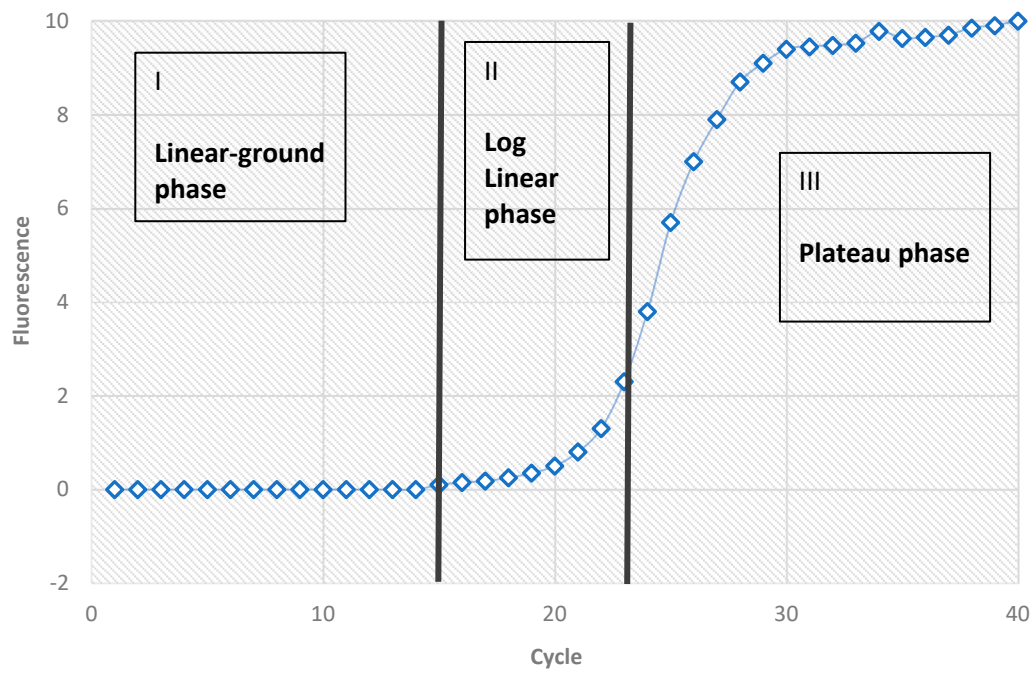

Figure S1. Real-time PCR amplification curves in linear scale. This figure denotes the three-phase sigmoidal curve of the positive PCR amplification. This plot is used to determine assay quantification threshold.
